# Supplementary material for: A Machine Learning Classification Model for Gold-Binding Peptides
Source: PubMed Central journal article supplement — ACS Omega. 2022 Apr 11;7(16):14069–73. doi: 10.1021/acsomega.2c00640 (PMC9089360; doi:10.1021/acsomega.2c00640), 2022-04-11
Supplement: ao2c00640_si_001.pdf [file ao2c00640_si_001.pdf]

# A Machine Learning Classification Model for Gold-Binding Peptides

Jose Isagani B. Janairo

Department of Biology, De La Salle University, 2401 Taft Avenue, Manila 0922, Philippines

Corresponding author email: jose.isagani.janairo@dlsu.edu.ph

## SUPPORTING INFORMATION

### R SCRIPT (CODE)

```
set.seed(1234)
```

```
library(Peptides)
```

```
library(dplyr)
```

```
library(caret)
```

```
library(ggpubr)
```

```
library(iml)
```

```
set.seed(1234)
```

```
df <- read.csv("datasetSI.csv", header = TRUE)
```

```
out <- kideraFactors(seq = df$Sequence)
```

```
output <- as.data.frame(do.call(rbind, out))
```

```
mother_dataset <- cbind(df, output)
```

```
mother_dataset$Class <- as.factor(mother_dataset$Class)
```

```
str(mother_dataset)
```

```
dataset <- mother_dataset[3:13]
```

```
validation_index <- createDataPartition(dataset$Class, p=0.75, list=FALSE)
```

```
validation <- dataset[-validation_index,]
```

```
dataset <- dataset[validation_index,]
```

```
validation$Class <- as.factor(validation$Class)
```

```
control <- trainControl(method="cv", number=10, classProbs = FALSE)
```

```
metric <- "Accuracy"
```

```
fit.glm <- train(Class~., data=dataset, method="glm", metric=metric, trControl=control)
```

```
fit.glm
```

```
fit.cart <- train(Class~., data=dataset, method="rpart", metric=metric, trControl=control)
```

```
fit.cart
```

```
fit.knn <- train(Class~., data=dataset, method="knn", metric=metric, trControl=control)
```

```
fit.knn
```

```
fit.svmL <- train(Class~., data=dataset, method="svmLinear", metric=metric,
```

```
trControl=control)
```

```
fit.svmL
```

```
fit.svmR <- train(Class~., data=dataset, method="svmRadial", metric=metric,
```

```
trControl=control)
```

```
fit.svmR
```

```
fit.svmP <- train(Class~., data=dataset, method="svmPoly", metric=metric,
```

```
trControl=control)
```

```
fit.svmP
```

```
fit.ann <- train(Class ~ ., data = dataset, method = "nnet", metric=metric,  
trControl=control)  
fit.ann
```

```
fit.svmR1 <- train(Class~ KF2 + KF3 + KF4 + KF5 + KF6 + KF7 + KF9 + KF10,  
data=dataset, method="svmRadial", metric=metric, trControl=control)  
fit.svmR1
```

```
# predicting using best model  
predictions <- predict(fit.svmR1, validation)  
show <- confusionMatrix(predictions, validation$Class)  
show
```

```
#Feature selection  
x <- dataset[2:11]  
predictor <- Predictor$new(fit.svmR1, data = x, y = dataset$Class)  
imp <- FeatureImp$new(predictor, loss = "ce")  
imp$results  
plot(imp)
```

```
ggplot(data = imp$results, aes(x = imp$results$feature, y = imp$results$importance)) +  
geom_segment( aes(x=imp$results$feature, xend=imp$results$feature, y=0,  
yend=imp$results$importance), color="grey") +  
geom_point( color="orange", size=4) +
```

```
theme_light() +  
theme(  
panel.grid.major.x = element_blank(),
```

```

    panel.border = element_blank(),
    axis.ticks.x = element_blank()
  ) +
  xlab("Classification Variable") +
  ylab("Variable Importance")

ggplot(data = imp$results, aes(x = imp$results$importance , y =
reorder(imp$results$feature,imp$results$importance))) +
  geom_point(size = 5) +
  xlab("Variable Importance") + ylab("Classification Variable") + theme_bw(base_size =
14) +
  theme(
    panel.grid.major.x = element_blank(),
    panel.grid.minor.x = element_blank(),
    panel.grid.major.y = element_line(colour = "grey60", linetype = "dashed")
  )

```

```
library(cowplot)
```

```

a <-ggplot(data = fit.svmR$results, aes(x = sigma, y = Accuracy)) + geom_point(size =
5, alpha = 0.7, aes(colour = C)) + theme_classic(base_size = 14) +
theme(legend.position = "none", axis.title.x = element_blank(), axis.title.y =
element_blank()) + xlim(min = 0, max = 0.1) + ylim(min = 0.7, max = 0.85)
ggdraw() +draw_plot(b) + draw_plot(a, x = 0.11, y = 0.12, width = .35, height = .35)

```

```

a <-ggplot(data = fit.svmR$results, aes(x = sigma, y = Accuracy)) + geom_point(size =
5, alpha = 0.7, aes(colour = C)) + theme_classic(base_size = 14) +
theme(legend.position = "none", axis.title.x = element_blank(), axis.title.y =
element_blank()) + xlim(min = 0, max = 0.1) + ylim(min = 0.7, max = 0.85)

```

**Table S1. Training and Test Dataset**

| Sequence   | Intensity | Class |
|------------|-----------|-------|
| HFSSWETQQG | 384446    | A     |
| WTHRDASTPW | 383659    | A     |
| WYEKWQKANW | 378302    | A     |
| WMETKWQARA | 373760    | A     |
| GTWSEHQNGW | 372844    | A     |
| ETWSMQQHEW | 371294    | A     |
| WRAGQAQMOW | 367860    | A     |
| WKPWMEPQHS | 367310    | A     |
| AMQQQWEMSQ | 363157    | A     |
| RWQIEEHFAP | 360512    | A     |
| PEESQEGWMA | 358214    | A     |
| TGEWGMQGIH | 356816    | A     |
| EEPHWEEMAA | 355438    | A     |
| WWKVANIHSK | 345972    | A     |
| RHWHSWTWEI | 344942    | A     |
| MNWKWGLESM | 342485    | A     |
| NWTAKWTQTH | 342381    | A     |
| HWIKIPPMMW | 341846    | A     |
| HWKQKVHWWG | 341349    | A     |
| WHKWWTHGHW | 340044    | A     |
| KYWQMWMSWK | 338940    | A     |
| KWQWKQAGAQ | 337810    | A     |
| EHQQWKETWH | 337270    | A     |
| GQWQWMDAGW | 336102    | A     |
| QWTWKIQVMK | 336075    | A     |
| TGHEPMEGWG | 334770    | A     |
| HWKGEMHTDF | 332748    | A     |
| PEEGPHSLWH | 332184    | A     |
| EWVEAMGGHT | 331057    | A     |
| WPAMGWNMEQ | 330589    | A     |
| KWAIWEMKGH | 330058    | A     |
| GETWETHYSE | 329553    | A     |
| WVHKRLNWTV | 329449    | A     |
| WSWPKVKSFW | 329447    | A     |
| MLGWMHQSWQ | 329003    | A     |
| NWKWQMKWTQ | 328402    | A     |
| EWHVKWSEAI | 328377    | A     |
| LAGVPMHWYT | 328328    | A     |
| QEHLSEMWGE | 327416    | A     |
| ASHQWAWKWE | 327039    | A     |

|            |        |   |
|------------|--------|---|
| WSEETEMWPL | 325272 | A |
| DMVWHESWGI | 323649 | A |
| WWLQKWHGSH | 323382 | A |
| ENHSWGGGGA | 323376 | A |
| QRHSWGGGEA | 322797 | A |
| WKATWAKYEK | 322695 | A |
| TWHIMWRHAW | 321358 | A |
| WEAKEWLHNW | 320623 | A |
| NKGGGWQGPE | 319988 | A |
| WGWKWEHSEA | 319819 | A |
| TEKLWWHNGS | 319782 | A |
| QTEWWTYRKG | 318708 | A |
| AESEWSMMMW | 318118 | A |
| KLWEVSRGWG | 317439 | A |
| WMAHAVVSPA | 317021 | A |
| SMEIQWQKPS | 316501 | A |
| RWPWHWQEMM | 316490 | A |
| EKSSKMESE  | 316344 | A |
| MPWESHEISE | 316121 | A |
| VHRGWSEMVW | 315620 | A |
| GEHMEHMEWS | 315460 | A |
| EWSSQRRWGN | 315172 | A |
| SRQWQTWAAE | 314740 | A |
| AESEHEWEVA | 314288 | A |
| TQWHEWHWYQ | 313682 | A |
| SQYWEHEVHQ | 312935 | A |
| HGHMRWWWWQ | 312299 | A |
| HIRGEHKWNW | 311701 | A |
| EWKHPIWVER | 310267 | A |
| PWSWHEIYLS | 310086 | A |
| WMNWESSQKH | 310018 | A |
| GWWARWMWMQ | 309848 | A |
| WWERGAGRGW | 309840 | A |
| VLWRHEWAWK | 309798 | A |
| TKWWWMTRVQ | 309764 | A |
| WWGMTMSKEK | 309480 | A |
| YWASHKHWWW | 308871 | A |
| WGEWHSEGLH | 308636 | A |
| REWWKGFHMW | 308628 | A |
| GGWHKLDESE | 308575 | A |
| REWGWAKSGR | 308462 | A |

|            |        |   |
|------------|--------|---|
| WQENSMEENW | 308362 | A |
| WGMWSHAHTG | 307131 | A |
| WHWQHEMESW | 307090 | A |
| RRWAIslRMW | 306510 | A |
| WEQSHVTQWE | 306318 | A |
| GMEGHWSRWW | 305771 | A |
| WEFRSHIHMH | 305745 | A |
| FVEGKSWGGL | 305238 | A |
| NLWMQGGIML | 304992 | A |
| WWHMQGWAWH | 304546 | A |
| EWHHNWEEWM | 304536 | A |
| GYHHWWGQPW | 304468 | A |
| SMWGTTQGHT | 304459 | A |
| AHALWIWHKT | 304010 | A |
| WSWESPWEWH | 303839 | A |
| HWEGHSWTIA | 303515 | A |
| QWGRDTMWWM | 303191 | A |
| WGVGSEMHHS | 302955 | A |
| HKWMHIQWTT | 302952 | A |
| WQKHTKWWWM | 302933 | A |
| EEAGRWYSPK | 302790 | A |
| KGWSMWQWGW | 302569 | A |
| APSWVNSMEP | 302503 | A |
| WKWWNKEVAE | 302479 | A |
| AMQWRQWSGS | 302423 | A |
| GHHGWVWFMM | 302327 | A |
| QSGSGRSWMM | 302180 | A |
| NEIKWAQWQW | 302015 | A |
| ESMHSWHWYT | 301875 | A |
| KSWNVGGAEW | 301554 | A |
| NWELEEHSAS | 301315 | A |
| WHEDHAWRSL | 301201 | A |
| GMWHIEHIWL | 301014 | A |
| GKTWDPWSGH | 301013 | A |
| WHHWAQGWHG | 300557 | A |
| YEAVSTTWQS | 300456 | A |
| WWKHTATSSS | 300162 | A |
| WKHNKTWGSS | 299746 | A |
| YGAWKTRWWM | 299229 | A |
| AHKWGWAAEW | 299107 | A |
| VWAFNMMEHQ | 298988 | A |

|            |        |   |
|------------|--------|---|
| WTEWTHIGAE | 298934 | A |
| WESDTIKISH | 298634 | A |
| TTWHGFPWAG | 298329 | A |
| WREWSHRWPW | 297938 | A |
| YWYWPQMGWH | 297926 | A |
| WWKHSQVVAH | 296970 | A |
| IHWQVMAESE | 296580 | A |
| HWYTTSGGDS | 296490 | A |
| GWALMHDENG | 296316 | A |
| MVWSLHHASW | 296265 | A |
| NHKTPAWMLQ | 296113 | A |
| RWWEMTMESL | 295888 | A |
| SWWTLMTMGW | 295451 | A |
| WEWATKPKEG | 295345 | A |
| VHYGSQIEWG | 295165 | A |
| WLKWKEKRGM | 294735 | A |
| ETEWLGHETL | 294621 | A |
| SLMKWMALAE | 294574 | A |
| WEERWTGTYE | 294531 | A |
| KWQEPWWWAT | 294477 | A |
| FAQDDWLMRH | 294377 | A |
| LWAHSEKLG  | 294095 | A |
| SHWRKIRQMT | 294014 | A |
| SKQMGTKWRY | 293954 | A |
| EWKWKHHGWK | 293890 | A |
| EWHVMWTEAL | 293814 | A |
| LWMAGKIGPS | 293726 | A |
| WGESVKIIHT | 293660 | A |
| ETGHHIWEWM | 293419 | A |
| VSWHLGKYKG | 293364 | A |
| SQWPWGKETS | 293245 | A |
| EKQWVGQAS  | 293225 | A |
| NWTHWSTTQH | 293033 | A |
| GHWQEIGDGV | 292661 | A |
| HRHWEWEAWM | 292499 | A |
| EWLHKHWWQR | 292416 | A |
| RGEHWKAYWW | 292327 | A |
| WIEHAWSRHL | 292235 | A |
| GWTWQAKKMA | 292078 | A |
| GEKSYWTGRE | 291909 | A |
| WSQKRWEIGQ | 291480 | A |



|            |        |   |
|------------|--------|---|
| WETVRSMSWW | 291399 | A |
| EGSDHPSWNQ | 291201 | A |
| QHEVEMMWSL | 291055 | A |
| KWWEESALHE | 290920 | A |
| GWKWEGAPWE | 290887 | A |
| EQKAEWWTHW | 290618 | A |
| GWSGAHWSEW | 290594 | A |
| WEHIWHKQAW | 290411 | A |
| SWLQWKWRGH | 290209 | A |
| WMMWGWVHEI | 290172 | A |
| FKPAGIWWNQ | 290147 | A |
| MTSTNEPYWA | 290084 | A |
| RRRWEEEAHL | 289915 | A |
| WISWEKVAAV | 289790 | A |
| LHWSSISWQH | 289406 | A |
| ETWHSWSVKW | 289177 | A |
| HWWWEHEMEH | 288862 | A |
| MSWHWNMTGW | 288613 | A |
| EPNWHAWSEA | 288453 | A |
| HQWKESHQGE | 288356 | A |
| IWQKWSKETE | 288277 | A |
| LWSPWAPKML | 288157 | A |
| ATADWSPMDY | 288099 | A |
| ENWHEMAQRG | 288096 | A |
| WMAVDRTGSG | 287617 | A |
| WWSLEVQEPH | 287554 | A |
| WSAVQRWHTH | 287451 | A |
| WWHGWVQMGW | 287377 | A |
| KGHIWKTWWH | 287325 | A |
| PVWQGWVHEV | 287037 | A |
| THMQAWVIWE | 286976 | A |
| MWSHIWYRQS | 286753 | A |
| WNEWTHNWTW | 286600 | A |
| SEKYHRWGLG | 286345 | A |
| WWEHGWHWGQ | 286329 | A |
| STGHKVVWPG | 286056 | A |
| WQERMLEQRT | 286002 | A |
| IHMWWGYSIP | 285945 | A |
| LEVRKEWGAE | 285842 | A |
| YWAMGLHWWT | 285686 | A |
| HWYAWKELHN | 285239 | A |

|            |        |   |
|------------|--------|---|
| SEWWMSHAFE | 284932 | A |
| WSWTESATEQ | 284916 | A |
| REWAEKESWR | 284784 | A |
| HRGWETEAWK | 284705 | A |
| PHHAEETLEG | 284628 | A |
| WQHEEYWWHW | 284628 | A |
| WWKVREYINE | 284443 | A |
| HWWSHATLAM | 284397 | A |
| SIWKEQMESQ | 284358 | A |
| QQWPHEHEWW | 284105 | A |
| EWASEWVHER | 283541 | A |
| TWLHMGEYPG | 283423 | A |
| EGTQHSTWQE | 283422 | A |
| NLTGKWSWTR | 283407 | A |
| RQGEWPHTMW | 283316 | A |
| SHHAEWMEH  | 283180 | A |
| WSWHWWHQAK | 282756 | A |
| AQWWTMTWEE | 282413 | A |
| WMEETWSSMR | 282400 | A |
| WSQIHIHAMH | 282160 | A |
| WSHMHRVAIG | 282092 | A |
| SGARQWEQWK | 282079 | A |
| VTWHMGPYPH | 281679 | A |
| AWEAEHRQIS | 281496 | A |
| RWSSHEGIHS | 281220 | A |
| WSGWGNWNHK | 281157 | A |
| YWNVGEQWHH | 281040 | A |
| WWQMWPQESH | 281011 | A |
| EHQISEPWT  | 280996 | A |
| AHWNDHGIWM | 280898 | A |
| GSSEWRQSWP | 280887 | A |
| YGHWSTNEKA | 280858 | A |
| WSIHWTEEAS | 280692 | A |
| HHTDQTWESG | 280414 | A |
| WFEPGSWGMD | 280308 | A |
| TQSWAHQRLQ | 280282 | A |
| HPWHYQEWGM | 280119 | A |
| GWGKNTISQW | 279782 | A |
| MTVVKMEHWG | 279494 | A |
| GWSTKISWEG | 279483 | A |
| WRGQQYTWHT | 279476 | A |

|            |        |   |
|------------|--------|---|
| WWREHMQERM | 279320 | A |
| PHWHWAHWIE | 279311 | A |
| WSWEWQMWAN | 279295 | A |
| TKEPGWMWDY | 279231 | A |
| SWIGKGEYKE | 279089 | A |
| HWKWHEEDQM | 278947 | A |
| GEGWEYEEAH | 278866 | A |
| MEEQAWKHHG | 278818 | A |
| KWYLSSRRMA | 278589 | A |
| WWTESETTAQ | 278512 | A |
| EWKRHKIVFW | 278465 | A |
| EWWTERNWHQ | 278278 | A |
| SWVWMSGHYG | 278267 | A |
| HPWAIHGMWR | 278242 | A |
| GMMEWAQPWK | 277972 | A |
| WWHWGQWQHM | 277892 | A |
| MWYSGPAYIS | 277804 | A |
| ESGEWHSGAH | 277712 | A |
| WHGWEWWGIH | 277643 | A |
| WVEQSTASEE | 277634 | A |
| HEAHMSTWEG | 277457 | A |
| NHTGQHWQIS | 277116 | A |
| MIEENKWRTT | 276976 | A |
| ETWEIWQQPT | 276799 | A |
| AHWQSESHAH | 276674 | A |
| MMQKWYMDQP | 276517 | A |
| MSTQMHHWAG | 276468 | A |
| GPWWAQIHGR | 276243 | A |
| HEQWMYWWWH | 276138 | A |
| AHAKWLWHMW | 275891 | A |
| LYLEWQWEKH | 275809 | A |
| WMEVRGHSKE | 275558 | A |
| WRIISHWTHH | 275358 | A |
| TTEKWTWAAW | 275167 | A |
| VEAWHEAATG | 275140 | A |
| EKTWARHGEA | 274712 | A |
| SWSTEMGNYN | 274305 | A |
| TWAITWMGWM | 274098 | A |
| WWHGSHVGKM | 273993 | A |
| GKWHHEGHWI | 273979 | A |
| MGVNFGWHAE | 273877 | A |

|            |        |   |
|------------|--------|---|
| HWMPEYHWWH | 273853 | A |
| GSLWEEAKWE | 273820 | A |
| NHEWWEVKWR | 273764 | A |
| AMGGPIWKEA | 273709 | A |
| EGSHWGESAA | 273644 | A |
| WVGQKWWHHW | 273439 | A |
| HEYGKMSEQW | 273325 | A |
| QSYWHETWGL | 273149 | A |
| PKQHDWDLKM | 273120 | A |
| EHGQFHWWK  | 272725 | A |
| GDWQTLRAEW | 272654 | A |
| TWWGQKVWWE | 272324 | A |
| GWWARTLSKR | 272276 | A |
| SWTWHELYKW | 272258 | A |
| VETWGWPMNE | 271900 | A |
| AHWHFEFMWW | 271844 | A |
| WEWEGQQITH | 271674 | A |
| TWHGMEWKSG | 271586 | A |
| GTWWEGQKEG | 271585 | A |
| IETMKWRSGW | 271244 | A |
| KWTSWASMSM | 270984 | A |
| EKKHQIYWWW | 270872 | A |
| LGMGWHEGHF | 270871 | A |
| WVEETWATGE | 270795 | A |
| RHVNRWVPS  | 270664 | A |
| LDWHGTHWLW | 270661 | A |
| SNMRQWGQWI | 270644 | A |
| QMGGVASGNW | 270636 | A |
| GKEYWMMPMW | 270598 | A |
| HEPTYWWGNE | 270577 | A |
| WEVEFEKHP  | 270534 | A |
| IWKAEHEKM  | 270472 | A |
| WHWEIESEWW | 270359 | A |
| WKVGWGMWWW | 270257 | A |
| AWQAQHADHF | 270236 | A |
| WRLGMLWWSL | 270180 | A |
| GHWELTWEE  | 270029 | A |
| EIVRAKRWSG | 269816 | A |
| EHWPWSMWTM | 269711 | A |
| REWWPHSHSW | 269674 | A |
| WWTWESGQYQ | 269661 | A |

|            |        |   |
|------------|--------|---|
| DHQVQLKWMI | 269612 | A |
| HGSRNSWEMG | 269586 | A |
| HLWLGHDWSS | 269578 | A |
| TWWESHIWAH | 269486 | A |
| HEGWALNWWA | 269334 | A |
| TELTKHAGME | 269064 | A |
| NWFIGWQHMG | 269048 | A |
| WHHWEIEGGD | 269043 | A |
| MTHWEPMRAE | 269043 | A |
| SEIYTEEWKA | 268924 | A |
| WHRGTWWWPW | 268920 | A |
| GWWPSKSRES | 268608 | A |
| HAMYHWWANI | 268603 | A |
| PDYWQGEVHN | 268544 | A |
| LSEESHWPWQ | 268292 | A |
| MHWPHGHTWW | 268279 | A |
| WMLHHEQHGT | 267810 | A |
| GSEEGMWSHA | 267799 | A |
| SSWEHSGEGG | 267606 | A |
| QSGWQYATSW | 267546 | A |
| ITVASEWEPW | 267316 | A |
| WPQLRSEHGQ | 267270 | A |
| WQMGWHWGGM | 267175 | A |
| WMWQMTWIHQ | 266812 | A |
| WPESHWSWQY | 266480 | A |
| WWLGSAPMMP | 266058 | A |
| VITAHQTAWL | 265830 | A |
| SWTWHWREHH | 265721 | A |
| IWWMHWWHKE | 265617 | A |
| SALSHHEFTW | 265177 | A |
| GWHHHASFNT | 265057 | A |
| HVRKWEASKW | 264998 | A |
| HSTWWEWEQH | 264733 | A |
| DGSSTEVLWK | 264675 | A |
| SMEKSWGSH  | 264360 | A |
| WGWEWTSGHV | 264174 | A |
| AEWVPHHEGG | 264076 | A |
| SAEQQWKSRL | 263801 | A |
| EQIWWHGHGR | 263518 | A |
| WSRHRVVTSR | 263507 | A |
| AGHWEKHEVA | 263444 | A |

|             |        |   |
|-------------|--------|---|
| VSSDEKHRSW  | 263382 | A |
| HHHQWDAGTA  | 263304 | A |
| AQMGGQWEVA  | 263194 | A |
| SWWSEWGRHG  | 262989 | A |
| EWLPWANSWS  | 262787 | A |
| IHQEQQWAYE  | 262787 | A |
| WSEWMWEARR  | 262784 | A |
| MMWRGMEQEE  | 262738 | A |
| GWQGIKKWWW  | 262532 | A |
| SSQHWWVWHH  | 262428 | A |
| HEYQPGEWVI  | 262418 | A |
| MMEEKHHLEV  | 262372 | A |
| NWWTHEGLIW  | 262370 | A |
| WGAYAMLWKW  | 262338 | A |
| HKWHYDQWGK  | 262265 | A |
| GHALYANIGY  | 261737 | A |
| HSVAFESQKW  | 261677 | A |
| HEWMEWHQHE  | 261632 | A |
| AIGWRGNKEW  | 261559 | A |
| PRTRHWQWWP  | 261543 | A |
| WMSKEWGEWE  | 261519 | A |
| KISLIWSWGG  | 261296 | A |
| GGWWEWHYTE  | 261197 | A |
| GQGEMHWWWP  | 261041 | A |
| SEIWEVKVHM  | 260929 | A |
| AGHWQLHQVA  | 260899 | A |
| THHTQHREER  | 260823 | A |
| WGHWANESHE  | 260640 | A |
| EESHSEWMWH  | 260547 | A |
| HPMGVGEEPI  | 260412 | A |
| KWYPGKAYHP  | 260322 | A |
| HWWTAKWWIS  | 260309 | A |
| PMWHEWWWEN  | 260225 | A |
| HWSKHSWHIE  | 259961 | A |
| NQQEWMYINVQ | 259914 | A |
| RWEWTEVLHD  | 259906 | A |
| SFEWWHQIEH  | 259895 | A |
| LGTMSSSWGK  | 259780 | A |
| EKYHINIMWL  | 259745 | A |
| WMLEREATWW  | 259724 | A |
| NEWAHHGRQH  | 259715 | A |

|            |        |   |
|------------|--------|---|
| KAHYTSIWYW | 259617 | A |
| ERMTAWRWWE | 259598 | A |
| EWMWWHTQGA | 259354 | A |
| ESREHLISTW | 259262 | A |
| WSYEASSDGA | 259243 | A |
| WTYGAWTQHR | 259132 | A |
| GQWMWSLHWH | 259089 | A |
| WVHMDKQWWV | 259071 | A |
| WWMVRQKHTM | 258490 | A |
| LGSWTHWMQW | 258476 | A |
| VTSLNTSAWS | 258432 | A |
| GMWGWKWQNG | 258416 | A |
| HLQHYEWWTG | 258214 | A |
| WTHEWVDLGT | 258111 | A |
| EWTKMALALS | 257985 | A |
| TSGWWHELEH | 257855 | A |
| WGHTARESHE | 257741 | A |
| RAWSAWEWWN | 257696 | A |
| VHWQTVLLVM | 257645 | A |
| ILRHAWKERT | 257349 | A |
| EWKTYRQWWT | 256906 | A |
| SWGRWKTHGS | 256663 | A |
| SWSQVMHKWV | 256586 | A |
| WSGPWWHWHG | 256561 | A |
| WHPEPALWWW | 256384 | A |
| SWEWWHLEYM | 256267 | A |
| TKWLWSGVEE | 256260 | A |
| LEWPKWDTGW | 256192 | A |
| RHHHHHWEEW | 256096 | A |
| SGRESWSWKT | 256016 | A |
| AWWGHHPAWN | 255942 | A |
| EWWEKWQESW | 255916 | A |
| WHMWWWHHIW | 255760 | A |
| PEEWHGEMGR | 255732 | A |
| PWESTGIQYK | 255646 | A |
| WLRSQMMQIG | 255606 | A |
| RLHWMWWTSL | 255594 | A |
| QHVRAIAWKE | 255487 | A |
| HGWHMKQETG | 255446 | A |
| SVEQSWHAQA | 255412 | A |
| SEKWWWWMRR | 255197 | A |

|             |        |   |
|-------------|--------|---|
| QWVQALGEGS  | 255192 | A |
| PAEPWWHHMW  | 255130 | A |
| MGRWNWWGGMG | 255054 | A |
| GTVWWHWTAS  | 254718 | A |
| KTMWHEWWMG  | 254703 | A |
| QEWESWAGHS  | 254544 | A |
| TMWMAIEETM  | 254468 | A |
| EKRWHATMEA  | 254396 | A |
| TSSWWWGMTW  | 254357 | A |
| GEMRLLWHME  | 254194 | A |
| WPTEFSHWPK  | 254191 | A |
| MWSWHWAEGG  | 254137 | A |
| YWKHNHWSWW  | 254105 | A |
| GAKYHWSARH  | 254093 | A |
| WWHHSEWFTH  | 253999 | A |
| RWHATRLWSK  | 253781 | A |
| HTRLTSLQSE  | 253695 | A |
| EKWWANHGEA  | 253655 | A |
| HEGWAIRWTA  | 253642 | A |
| HQYGLMPQNW  | 253586 | A |
| HGVHWMGISL  | 253403 | A |
| AHWQTEWHAH  | 253386 | A |
| WESWWHWKTY  | 253231 | A |
| LGAHHRAPEA  | 253099 | A |
| AIWQQIHLWS  | 253005 | A |
| TSEHGWHTGD  | 252915 | A |
| PWTVMLKSSR  | 252830 | A |
| GIQSWWGANK  | 252737 | A |
| MEWWTHPTWH  | 252692 | A |
| WEWHEWHWYE  | 252645 | A |
| HKWVALPQEP  | 252310 | A |
| GWWPHASIAK  | 252255 | A |
| LGTKHEGMWS  | 252175 | A |
| WLTHWIDHER  | 252131 | A |
| SELIWTHREP  | 251878 | A |
| ESLSWGSDEA  | 251804 | A |
| MVSLEWWHWE  | 251750 | A |
| GWDSSWGRWW  | 251657 | A |
| HEEWSYWWWH  | 251365 | A |
| QDSHWISWRV  | 251252 | A |
| LVHGHERWQ   | 251121 | A |



|            |        |   |
|------------|--------|---|
| WPKIVWIGMW | 251052 | A |
| LWTEQPAIHQ | 251046 | A |
| RDWALTKNSW | 251009 | A |
| WNQSYNWSPF | 250831 | A |
| WQHLHIHGEQ | 250797 | A |
| WSAPWMWTGG | 250776 | A |
| QMEWQYASMS | 250744 | A |
| IRHSMEWWVT | 250482 | A |
| VLPSWHSSHG | 250345 | A |
| MPSHGKKSAE | 249801 | A |
| VHHRHGRWHI | 249777 | A |
| WEGHWHLNAS | 249579 | A |
| SMAKTKWSEE | 249435 | A |
| WTIDLWHGPG | 249430 | A |
| WLWWEMVRAV | 249355 | A |
| ELSSRKWMEG | 249139 | A |
| WEEMVLHHS  | 249003 | A |
| GWEGSYPGKT | 248790 | A |
| IEYGMSTEEW | 248680 | A |
| WTELHLIASH | 248349 | A |
| TAKWHHESWY | 248346 | A |
| WKWIWLQHEN | 248249 | A |
| PFWQGFEEEE | 248212 | A |
| IPQEPHWKWQ | 248102 | A |
| WKHLGRVAHE | 247983 | A |
| AWHHKVAAQE | 247701 | A |
| GEWAWWGKAW | 247455 | A |
| QSWSKRRHQW | 247378 | A |
| GGMQDPQGSW | 247345 | A |
| AMMKSMTHWA | 247184 | A |
| SEEWHHGSGN | 247116 | A |
| MIFWGSRRHG | 247097 | A |
| ARWEERSNQE | 246977 | A |
| HYWWGWVPRH | 246789 | A |
| WHMRWSHHHA | 246597 | A |
| NNYISGWEWM | 246457 | A |
| WIAWWSVMHK | 246374 | A |
| RSWEKSLEPI | 246367 | A |
| LYITKQGELY | 246278 | A |
| ARWEWAIMEA | 246119 | A |
| WSAEHKNEAK | 246045 | A |

|            |        |   |
|------------|--------|---|
| AWLHSVAREE | 245935 | A |
| KEYHRTQIEW | 245700 | A |
| WSNHMLLHKM | 245504 | A |
| LMWGWKSES  | 245469 | A |
| EYIWHHKRMI | 245400 | A |
| WLSWRLQVAE | 244965 | A |
| WHWAGWWAWM | 244885 | A |
| WWHLSWNHAW | 244718 | A |
| MYKGWEWEMH | 244573 | A |
| QFKMEFKAAE | 244566 | A |
| HTLRKYHWTG | 244561 | A |
| GTPGAGWMEW | 244424 | A |
| TLWMEESETE | 244420 | A |
| ATEWSEVIHR | 244220 | A |
| AEWEWTSSSY | 244206 | A |
| SKQGEGWLEI | 244125 | A |
| PSGEGQEWVI | 243899 | A |
| MKTGQWESHM | 243744 | A |
| SGKRWPGHGA | 243689 | A |
| EWARWMHMHM | 243554 | A |
| AWIHMVAREE | 243435 | A |
| SSWGWHELWE | 243419 | A |
| SMHQHNLEIQ | 243303 | A |
| WWWETSWEWH | 243112 | A |
| NWLWSQWMWT | 242948 | A |
| SEIYTEQWKA | 242803 | A |
| SNPVRKLMWS | 242786 | A |
| YTAKGLHWTT | 242656 | A |
| TMWKIVIMKW | 242399 | A |
| GEEGMEQEFE | 242360 | A |
| WKQVREHMLE | 242303 | A |
| MWWWWIRTKP | 242295 | A |
| LHEEEWAYE  | 242111 | A |
| FWMSMWTMQH | 242079 | A |
| WEWWAHERKE | 241956 | A |
| AGASWWKPHH | 241807 | A |
| WPSHSTHQAI | 241759 | A |
| YMSSVDWGYH | 241753 | A |
| HSEGIWTNWW | 241633 | A |
| GWAKAHREIG | 241500 | A |
| AHEWAGRLES | 241494 | A |

|            |        |   |
|------------|--------|---|
| NWDSYWSWNR | 241482 | A |
| QQMGMETKKG | 241444 | A |
| WMRHKIIHLK | 241384 | A |
| SGKEKAIWWT | 241186 | A |
| VSHWHWHPHA | 241043 | A |
| WSWKWSAWAL | 240983 | A |
| MYPAMQEAAW | 240896 | A |
| AWTWSWWKRE | 240678 | A |
| HLNHEHMWQW | 240628 | A |
| PHMEHWAGGW | 240591 | A |
| LILQSGHKEE | 240362 | A |
| AHWHKQKKWW | 240190 | A |
| MQWSKPGAKQ | 239931 | A |
| GGWGLIRQPE | 239818 | A |
| HGAWSARTMH | 239697 | A |
| WQAKDWLHRT | 239672 | A |
| WVQDFTAPEQ | 239418 | A |
| NKEWEDAHWP | 239263 | A |
| GWLEEKHSRK | 239179 | A |
| PSWEPHHWAG | 239065 | A |
| MESIMWAKLS | 239063 | A |
| LVVLRRLKWD | 239020 | A |
| SHIVWTVKGG | 238828 | A |
| WYWELHQWWS | 238776 | A |
| WQWMMMAMWR | 238642 | A |
| LHKWEKAAGE | 238586 | A |
| SKAKSLWPEE | 238311 | A |
| TEKTWHTISY | 238232 | A |
| REHLWADTQT | 238210 | A |
| KSVTKKEHWG | 238155 | A |
| LSLSHQSWLE | 237816 | A |
| NHWHVDIWRM | 237803 | A |
| IHTMMHMWRG | 237574 | A |
| VPGWGSGKHA | 237504 | A |
| HTTSALWWHP | 237436 | A |
| HGMYPWWWN  | 237315 | A |
| MDQGMHSLWH | 237255 | A |
| LGMEEHAWQK | 237230 | A |
| TWRLTKNEPG | 237200 | A |
| RTHPTWGYLW | 237048 | A |
| AMHDSATLWE | 236927 | A |

|             |        |   |
|-------------|--------|---|
| HGHEWKHMYS  | 236805 | A |
| ETDEHLLSWW  | 236740 | A |
| HKKVHVWKKW  | 236585 | A |
| DWIIKHTWRA  | 236432 | A |
| EHQWEQITHT  | 236148 | A |
| THLMWEYGLG  | 235892 | A |
| WRHHPHWPHG  | 235679 | A |
| AHMEVWPLHV  | 235626 | A |
| HGHSDWVWWE  | 235605 | A |
| YWYWSESGYH  | 235481 | A |
| QWAPQSVHEA  | 235441 | A |
| EGWSGRRELS  | 235436 | A |
| WEAFEWMHQW  | 235362 | A |
| PSEWIATHGH  | 235340 | A |
| HIGPRMWHNT  | 235179 | A |
| WSHEMGVGIL  | 235082 | A |
| EFPIMGGAQE  | 235012 | A |
| GWWTGWTKRH  | 235008 | A |
| PKWMKWWWGH  | 234830 | A |
| LRHTSEWVWV  | 234767 | A |
| IFWVAMTEGT  | 234650 | A |
| MGAARSRRWI  | 234446 | A |
| QGSSTEV LWK | 234383 | A |
| PHMELEGAGN  | 234358 | A |
| MSSMRSEAGE  | 234309 | A |
| LRMEMSSSW   | 234229 | A |
| NDWKHQHEST  | 233998 | A |
| QGRWWWVWTT  | 233911 | A |
| IEMTSHWLDS  | 233738 | A |
| THLVWVMMHH  | 233725 | A |
| WYGMWEMAQW  | 233710 | A |
| AQWEWAIPER  | 233642 | A |
| LWDQKTTSAP  | 233592 | A |
| KMENGRQWSH  | 233588 | A |
| NWWEFALWVG  | 233521 | A |
| MFGSPLQEGL  | 233475 | A |
| RDQQWKYRVD  | 233465 | A |
| RWAMRSYHEA  | 233442 | A |
| HVDFWGAWMW  | 233186 | A |
| RRYHMGWQWK  | 232972 | A |
| GWHGTTGDKS  | 232824 | A |

|            |        |   |
|------------|--------|---|
| LEAGHETGGA | 232770 | A |
| GDGWAHRRTA | 232760 | A |
| AHEWGENWWW | 232713 | A |
| AKEWWAMEIW | 232431 | A |
| LKWGWRLSES | 232025 | A |
| KLTKIWTWGG | 232011 | A |
| SWWVSMMWWQ | 231875 | A |
| GWWWEAMFSA | 231433 | A |
| WSMLVWLHSW | 231100 | A |
| EWSLKAIAM  | 231013 | A |
| EWGSWWLGEK | 230981 | A |
| GGHKRTWTTD | 230903 | A |
| PMTSEMQWD  | 230866 | A |
| MDMGEQRTAH | 230742 | A |
| IEAKLKGTWY | 230561 | A |
| TEQAWPESYQ | 230554 | A |
| WYEKWRKARW | 230385 | A |
| MDGTGSTWWW | 230285 | A |
| VKSTWIWWIH | 230213 | A |
| PTWQVHHREW | 230204 | A |
| MQRLWRWWEQ | 229899 | A |
| RWKWHSRQKK | 229893 | A |
| KVWFLHHAFW | 229846 | A |
| KHWGTAGSHE | 229834 | A |
| VEWWGWSSQE | 229805 | A |
| GGNWRAGSA  | 229689 | A |
| MEYHRWELEW | 229575 | A |
| ESVTSISMAM | 229532 | A |
| WTHEPHVGLK | 229488 | A |
| KRNDDMSAHW | 229343 | A |
| VTKTTYWEHT | 229293 | A |
| MHWETWSHHW | 229213 | A |
| RKEKWDVLLK | 228854 | A |
| WSHEHEMGKE | 228524 | A |
| KAWWMAGKHP | 228346 | A |
| QSWWAKWDWE | 228278 | A |
| MLSSQSWWWQ | 228093 | A |
| VWSLQWSAWT | 227785 | A |
| RGATWWWWT  | 227748 | A |
| GWQTSWGRWW | 227584 | A |
| EITKWSLTWE | 227394 | A |

|             |        |   |
|-------------|--------|---|
| FYWESWSTWP  | 227373 | A |
| RTITMQWLWS  | 227370 | A |
| PSWHHVTHMN  | 227065 | A |
| EQELNMTMHG  | 226991 | A |
| ASGKPWEYHS  | 226980 | A |
| WLGLAWTRHK  | 226568 | A |
| IQASKRSTWG  | 226469 | A |
| HALELMGILS  | 226397 | A |
| WPWMWWHVEE  | 226318 | A |
| LGSKSSPWGH  | 226287 | A |
| MHSEGIAWEM  | 226133 | A |
| VIEYSGQFQW  | 226110 | A |
| WWEWWHLGAE  | 225757 | A |
| WPAWWRMYGM  | 225536 | A |
| KHWGTAGTHE  | 225484 | A |
| VWWQEMIDWW  | 225462 | A |
| EMKGMTGWYP  | 225337 | A |
| FGGRKLNES   | 225179 | A |
| WMHTKATKRK  | 225167 | A |
| AIESWAKEHS  | 225151 | A |
| PGILSNYEHG  | 225148 | A |
| PWGHWSEHHS  | 225079 | A |
| RLMEWSEHEN  | 225079 | A |
| WKTLLWKASAH | 225063 | A |
| WVHLRIRWTV  | 225055 | A |
| EESESAWWEG  | 224998 | A |
| HEYNKKEWTH  | 224665 | A |
| EWEEWWYRMH  | 224462 | A |
| WYWQIGQWWM  | 224093 | A |
| QHENKGHWWL  | 223953 | A |
| VMWFTWWGRA  | 223909 | A |
| MWPTHQHYIS  | 223754 | A |
| STGWAKGKWM  | 223717 | A |
| ETLRHLHVKW  | 223702 | A |
| LRAHSRSWQR  | 223683 | A |
| AQTWKGMHMMW | 223607 | A |
| TRQWPHRTMW  | 223207 | A |
| ESGGRWEEWL  | 223111 | A |
| GRWRSLRAET  | 222851 | A |
| ITWALHHSWR  | 222839 | A |
| GKLWPWLLRH  | 222649 | A |

|            |        |   |
|------------|--------|---|
| WIWNMLNESW | 222305 | A |
| SWSHTRQTLH | 222130 | A |
| MFQGWTVTGG | 222066 | A |
| IAGYMMHWYS | 221931 | A |
| GQYRKEEWSH | 221918 | A |
| GSAHLHRDRE | 221904 | A |
| HSMPRWIEIE | 221893 | A |
| RMMHHMMDLQ | 221670 | A |
| RGKSKWMHSE | 221581 | A |
| LVVLRKDKWE | 221495 | A |
| IRWHESGTIW | 221494 | A |
| GREHEMWEML | 221480 | A |
| KGASMFGWWY | 221472 | A |
| WSEEWWTWSR | 221221 | A |
| HIDGYEWSSG | 221182 | A |
| WWINQAWWSW | 221120 | A |
| SWIHINKEM  | 221091 | A |
| IHTGYWQHFH | 221077 | A |
| WMMHGWTWWP | 220948 | A |
| AKEEKHWLEA | 220872 | A |
| HWSTNWKGKG | 220800 | A |
| TQSVRMLPWS | 220788 | A |
| LAMEKSGLMW | 220568 | A |
| AFASWLPHTT | 220545 | A |
| WWGKSLMLEL | 220503 | A |
| GKSRDWEGNG | 220503 | A |
| QISLWFLTWQ | 220328 | A |
| LVMIQWWGTE | 220232 | A |
| HSERKVTWEL | 219882 | A |
| MGWSWWTWGH | 219832 | A |
| WWWWKSWSHW | 219789 | A |
| AKQNDWELMD | 219542 | A |
| MWTERSKGRH | 219412 | A |
| AWHWIELEWW | 219387 | A |
| AMHHQEAQQW | 219264 | A |
| WWREYAWTEW | 219193 | A |
| EWWTSEEIEW | 218988 | A |
| KREPEMSSSW | 218917 | A |
| HEVATAGRSW | 218899 | A |
| KQRRVEEWNT | 218828 | A |
| QVPAWWEVHR | 218764 | A |

|             |        |   |
|-------------|--------|---|
| GSWWSWSGWG  | 218675 | A |
| WLAWGEWEKF  | 218626 | A |
| KMEWHAPHGG  | 218185 | A |
| SWAHSTKGS   | 218115 | A |
| QMEETGMEAH  | 217960 | A |
| PHLQHRKWHS  | 217868 | A |
| THLWWTHGHW  | 217636 | A |
| THHWEHQEER  | 217572 | A |
| WKS NKSTHHQ | 217557 | A |
| LWEMWWMEWG  | 217498 | A |
| HRTHEFGSHW  | 217124 | A |
| ERPNSLKWRM  | 217059 | A |
| TGMYHDWGKH  | 217057 | A |
| QHRWENHSHS  | 216487 | A |
| LAKSHWRGHE  | 216460 | A |
| KWEHSMEGGP  | 216454 | A |
| WGWAETWASL  | 216425 | A |
| IVHGHERWD   | 216409 | A |
| AKMHMAAEHS  | 216235 | A |
| LWHWTWESVQ  | 216054 | A |
| WAQWASWMYK  | 215853 | A |
| HWPTTESSGH  | 215706 | A |
| HSMSRWLELE  | 215645 | A |
| FRDWNSWAAE  | 215371 | A |
| KYHWLMWHEK  | 215359 | A |
| WWSQSQTSAN  | 215250 | A |
| SEERWPIHG   | 215203 | A |
| EMYHLQIMYL  | 215067 | A |
| GPKAAGMFWA  | 215028 | A |
| RTKAEWSMWA  | 214979 | A |
| SLHGHQRHEM  | 214659 | A |
| ASSMTSWHWA  | 214437 | A |
| HTYASLEIGR  | 214367 | A |
| MMHSQHGTHA  | 214362 | A |
| HEKESHQEGK  | 213977 | A |
| SHGILMELQH  | 213963 | A |
| WWWETEWWRE  | 213684 | A |
| EWVWAMWQWE  | 212933 | A |
| EIQLTETSWW  | 212931 | A |
| YEASIPRWSL  | 212753 | A |
| EMFHEKYWWW  | 212699 | A |



|            |        |   |
|------------|--------|---|
| TWLYARIHML | 212690 | A |
| KVVKNMQMWE | 212402 | A |
| GWEGWYSHFW | 212367 | A |
| QASHWARTH  | 212188 | A |
| KKTHEWWTQR | 212177 | A |
| WWWTWVEPWS | 212138 | A |
| WIVEWELTTT | 211917 | A |
| LWAHSQLLGG | 211868 | A |
| MLDGQETIQH | 211843 | A |
| SGLATMGHGA | 211781 | A |
| MYLWFEGGKY | 211705 | A |
| HWEWWWGRWW | 211529 | A |
| PTHGKEQYKE | 211460 | A |
| EGIETRGDHE | 211223 | A |
| AMFHFAAEIS | 211171 | A |
| MSHRFSIQFE | 211054 | A |
| YGIWTWQEFR | 210899 | A |
| EHVRAIAWME | 210768 | A |
| AEWVKHHQGG | 210335 | A |
| GGAIYARHGY | 210300 | A |
| SHERGAWAPI | 210110 | A |
| MPHSEHHWHA | 210084 | A |
| YEAVMSSTDF | 210046 | A |
| SQDMGVPDWE | 210014 | A |
| PMMWWTGLST | 209909 | A |
| QSSSEELWW  | 209884 | A |
| AYKIWMNMTK | 209737 | A |
| HHSVGHVVRW | 209151 | A |
| NSPGHHEEL  | 209018 | A |
| WQQTYQWWTS | 208972 | A |
| SMEKTWGSHE | 208953 | A |
| HMTDQWGGQG | 208952 | A |
| LWYWWWHGEW | 208761 | A |
| NHWHWWWWEL | 208575 | A |
| PELTWWTLRA | 208400 | A |
| RMEQSGKEAH | 208086 | A |
| KGATRWTELE | 208014 | A |
| HMKWTWMKNH | 207972 | A |
| EYHWHHLAKH | 207836 | A |
| PMGYQEIQWD | 207816 | A |
| QWEMWWIEEL | 207607 | A |

|            |        |   |
|------------|--------|---|
| MGGEEASFGR | 207561 | A |
| IEATMQTWWH | 207296 | B |
| HVIWIEEQGW | 207255 | B |
| HMWRNSKDNT | 207075 | B |
| SAISHGQMSW | 206846 | B |
| WYWDHGRWTK | 206822 | B |
| VAMFSMSSWI | 206530 | B |
| RWFAGWWSWA | 206248 | B |
| KKEYDQHRWR | 206076 | B |
| GEAHKPSWQG | 205866 | B |
| ASAWWKTIWW | 205778 | B |
| TEKWMHAGPE | 205661 | B |
| MDHWNQHGKE | 205416 | B |
| KRSRHWQTSK | 205121 | B |
| YMHWEKRLH  | 204885 | B |
| HKWVAKSEGS | 204879 | B |
| NETAMSGHTY | 204842 | B |
| NHERKGHWWI | 204776 | B |
| DQMMMEQISS | 204767 | B |
| MTERSLSGGM | 204766 | B |
| PMEWTGRHQH | 204624 | B |
| QIRSVREAM  | 204289 | B |
| KHTHHPAQQM | 204241 | B |
| MWYKWWNNSA | 204160 | B |
| AKMLMKSHWA | 203811 | B |
| WSWSALEGWS | 203664 | B |
| EDLAETTSHS | 203342 | B |
| MSIDWLSAGH | 203269 | B |
| AWHWLEMEWW | 203014 | B |
| ATSTMWTLAQ | 202972 | B |
| KKYWWWYAGW | 202703 | B |
| KYMAKRQAAW | 202372 | B |
| KSPHHWYADM | 202259 | B |
| KHWEPWMHHT | 201989 | B |
| QKKHRIYTTW | 201836 | B |
| IGAWWARWSI | 201577 | B |
| SWFIQVNQKG | 201287 | B |
| WKATTALYEK | 201086 | B |
| GHWEEKHQGV | 201033 | B |
| WDLGSLWWTK | 200830 | B |
| ALEEKHTIQA | 200811 | B |

|            |        |   |
|------------|--------|---|
| MIGQRKSDIG | 200502 | B |
| GHWEALHHHM | 200458 | B |
| IWGWPWQMVN | 200441 | B |
| EDEEKGSWTK | 200436 | B |
| WMHLGRVAHE | 200258 | B |
| REWAHHEAQH | 200246 | B |
| MYNGGEYHA  | 200133 | B |
| RWRPYTMTRA | 200094 | B |
| WAHHMHTMHG | 199386 | B |
| LYYREEDYHA | 199369 | B |
| VWMWTYWEHW | 199253 | B |
| RGSHVRHWAL | 199104 | B |
| KVSRGSWHDV | 198784 | B |
| WKAHAYVPMA | 198553 | B |
| GGKRRMRGPW | 198477 | B |
| ASQWNEYWGT | 198349 | B |
| TRQMEAWVHE | 198122 | B |
| SWSVFWIQP  | 198049 | B |
| GWWMHAPHAL | 197835 | B |
| MSHHRRLEL  | 197818 | B |
| TTREYAWSET | 197697 | B |
| AHEWAGRIQS | 197646 | B |
| ATHTHQLQTW | 197395 | B |
| RSGKSWEYIT | 197231 | B |
| PLGEQMTQLG | 197115 | B |
| GQVASAEAMW | 196973 | B |
| HGKYMKWSTR | 196890 | B |
| PIGKPTHMWP | 196598 | B |
| SWWSWVQKTM | 196452 | B |
| TIAWGQTELK | 195768 | B |
| SVWTKIIRTW | 195750 | B |
| HIIVHVSIIW | 195707 | B |
| AMASTIMHST | 195703 | B |
| GWWWFKWWEW | 195644 | B |
| MRRWRPWAAD | 195626 | B |
| FEEQVGGWEW | 195420 | B |
| ADWWSKSTQQ | 195280 | B |
| WEWAWPTFEG | 195050 | B |
| YWYTMNKGWH | 195028 | B |
| ASSISARGLW | 194956 | B |
| FHHVWSVLGG | 194933 | B |

|            |        |   |
|------------|--------|---|
| MTMGPRNSIG | 194826 | B |
| AIQSWALQHS | 194772 | B |
| WEMWWHWLSY | 194694 | B |
| YFWHLGKYKG | 194685 | B |
| HQRTKYWWTH | 194515 | B |
| KTSTWHRSLK | 194434 | B |
| KHKWEMRRGE | 194196 | B |
| VIWEWYKKVS | 194112 | B |
| WHWNHEKQSW | 193909 | B |
| VHDGWVESVW | 193659 | B |
| AWDFPREWWQ | 193599 | B |
| WMWLWMATAI | 193182 | B |
| IIWEVPAGTE | 193127 | B |
| FRHHEKHMIL | 193126 | B |
| WSWSEPASER | 192576 | B |
| RGRVRLKWKI | 192250 | B |
| ASWQLSLQMH | 192170 | B |
| VISAGRSAWI | 192162 | B |
| RRKGMQSLWG | 192082 | B |
| WTHRRASTMT | 191638 | B |
| RTKHEWDHKE | 191144 | B |
| GSKPRQKMEH | 191053 | B |
| HHHLGAVWLR | 190894 | B |
| MELYHRWGIG | 190806 | B |
| LYVREEEYHA | 190760 | B |
| KMTESHQHSQ | 190196 | B |
| LGTKHEHPWS | 190175 | B |
| GHHEIHYPEP | 189984 | B |
| WWWWETAWGE | 189925 | B |
| RTKHETRILE | 189772 | B |
| VEAWIERRWG | 189738 | B |
| PHGILKELDH | 189584 | B |
| ESWFQGNRET | 189201 | B |
| LDYHRSDHQT | 189146 | B |
| NMEMWQVKKM | 188909 | B |
| RHTWRGLKET | 188780 | B |
| WEVEMQLGGM | 188669 | B |
| TEEHTIWKWI | 188642 | B |
| SHHGEAWSGN | 188567 | B |
| HHNDRRTAYQ | 188358 | B |
| KFEQGNEWSH | 188334 | B |

|             |        |   |
|-------------|--------|---|
| TVGDLTWGGT  | 188310 | B |
| RHEPGWAHAW  | 187774 | B |
| TDSTAHRRID  | 187655 | B |
| GESTESHYPD  | 187609 | B |
| STHTEHHWHR  | 187462 | B |
| EEWATWGIAT  | 187081 | B |
| EESEYQEAG   | 186962 | B |
| HMGRLHMOVHH | 186714 | B |
| RGETWQVLWA  | 186713 | B |
| AGRSEQRSSW  | 186626 | B |
| AHPMDHQARE  | 186528 | B |
| KEQPDEGWKA  | 186453 | B |
| TRGRRYSWHT  | 186042 | B |
| EMTTMTFETE  | 185950 | B |
| TTEGHHSEQE  | 185757 | B |
| GKWRRPLRRS  | 185699 | B |
| IWGTHLTHQI  | 185637 | B |
| FHLRASVHSR  | 185289 | B |
| VALKKLMMWH  | 185041 | B |
| MHTKQRKQFD  | 184927 | B |
| NTGARSLWTK  | 184902 | B |
| RGQSTRVIWA  | 184711 | B |
| TFHHSSEEAM  | 184124 | B |
| IWYWWSGGQT  | 184084 | B |
| LYHTKRGEIY  | 183881 | B |
| HIWEAKHIHS  | 183693 | B |
| YSRVEQRTHG  | 183662 | B |
| SENRHLEMSW  | 183650 | B |
| KNRISRTWEQ  | 183417 | B |
| MRYWDGDVHR  | 183285 | B |
| MERRHIQKPW  | 183114 | B |
| EAWTEFWSER  | 183047 | B |
| DWEKTTHEDL  | 182883 | B |
| KMEHIVSSKE  | 182867 | B |
| KLFSRSWTWR  | 182750 | B |
| HGRHMRPSEL  | 182717 | B |
| EGWWWGVMWF  | 182622 | B |
| WKAKGTRKEN  | 182620 | B |
| SSQGGHMEDQ  | 182598 | B |
| HHPVGHRVRW  | 182564 | B |
| HQHLEQASRQ  | 182344 | B |

|             |        |   |
|-------------|--------|---|
| VHHRHGAWHI  | 182296 | B |
| YLMKVRSGYH  | 182092 | B |
| LTDSL DAGAD | 181916 | B |
| SYSASQEAAW  | 181868 | B |
| ERHEHHIEQH  | 181790 | B |
| RSGARFLWTL  | 181474 | B |
| MHHAQQSLQG  | 181461 | B |
| LNRKLSIVAW  | 181368 | B |
| ETWGESLLRE  | 181232 | B |
| ESMSESM AAE | 181069 | B |
| LERWSEWWWH  | 181041 | B |
| RIHSKSWSMI  | 180862 | B |
| MKSGMFRGHS  | 180556 | B |
| SWMINYRDKG  | 180543 | B |
| IMNQMHWKWR  | 180328 | B |
| VHRGWSQKVW  | 179956 | B |
| HGFEYSRGKG  | 179816 | B |
| MSHRMPHRME  | 179748 | B |
| ISMGVGEESL  | 179683 | B |
| LLYTSWYAET  | 179333 | B |
| TESGGEQWAL  | 179209 | B |
| LLPERSQMHL  | 179140 | B |
| HHEKALWHR S | 177425 | B |
| ELEVSKLKKW  | 177146 | B |
| LHHKGEQYVS  | 177088 | B |
| YEATLSRWSK  | 176566 | B |
| QKGEVAMGRW  | 176420 | B |
| SGSQSPKEGV  | 176327 | B |
| VWWKEWWRWW  | 176206 | B |
| DETEFWAEGM  | 175649 | B |
| WMLHVWHGKT  | 175637 | B |
| HWWSWFWNET  | 175554 | B |
| QHRHPQSMTS  | 175407 | B |
| WSGWGRWRHK  | 175124 | B |
| TEQKVIHHHS  | 174761 | B |
| LGASRTSELE  | 174614 | B |
| SIHSLYTHSM  | 174399 | B |
| SMTWEWYWWE  | 174095 | B |
| PEPGGEDWAI  | 174025 | B |
| GQAGLMSWRG  | 174001 | B |
| KMRRGMKEIH  | 173353 | B |

|            |        |   |
|------------|--------|---|
| QHRWWWWWWW | 173228 | B |
| SESQEDNHSG | 172985 | B |
| WLRVREHMLQ | 172739 | B |
| PSELSPTAAW | 172718 | B |
| AHWHKRKKTW | 172676 | B |
| QSQWIGGETI | 172613 | B |
| HLLVHVSLW  | 172063 | B |
| RLEEVAKGRW | 171803 | B |
| GAWWESWWGD | 171530 | B |
| ELWMWTMWW  | 171496 | B |
| TKEMWAAGKQ | 171059 | B |
| SWWEQLVTTE | 170889 | B |
| IIAHATKEAS | 170848 | B |
| GHHGNEHMSK | 170671 | B |
| GSQEGKTS   | 170545 | B |
| WARWAKSLYI | 170514 | B |
| SSELTSWAAW | 170174 | B |
| NEHSHSKGEW | 170164 | B |
| AGKQYWMIHY | 169991 | B |
| WKRHLIIHIL | 169736 | B |
| KKQQLHHIEV | 169502 | B |
| QSWQIWRNMS | 169432 | B |
| IWGWILWHEL | 169427 | B |
| PGARDSQDWL | 169422 | B |
| GRVAPAEAKW | 169415 | B |
| TSMRRTEIEW | 169370 | B |
| KFEWAIELWL | 169261 | B |
| QAWIAAYARR | 169090 | B |
| QSIHHVVKW  | 169030 | B |
| SKWLWSGVQQ | 168929 | B |
| RHTWRGKKET | 168766 | B |
| SKHEESWEKG | 168603 | B |
| LAWLMSRIQE | 168570 | B |
| KRPTHWNHHE | 168549 | B |
| KETWSHKSTH | 168535 | B |
| KLKAEHSWRR | 168329 | B |
| RLEEGWNGKE | 168232 | B |
| STIDSTLESE | 168104 | B |
| TGLYWGEWFR | 167969 | B |
| PVEDMWGARA | 167904 | B |
| HALQIKEHLS | 167893 | B |

|            |        |   |
|------------|--------|---|
| ESTHMSMVL  | 167865 | B |
| ATQWPQVHHR | 167753 | B |
| WMRIRSQHGR | 167640 | B |
| IHHKGQRYVM | 167639 | B |
| RQSQMWAEGK | 167317 | B |
| GGAHYARHGY | 167209 | B |
| HSYASIQHGR | 167082 | B |
| VFTHVHHHSV | 166832 | B |
| RTNHQEHMAM | 166699 | B |
| IWSQNMAHHR | 166358 | B |
| SLLSESVHRH | 166026 | B |
| MHAIHNATGA | 165663 | B |
| HMSSTQTDRG | 165562 | B |
| KWKMKWSKQG | 165518 | B |
| QAWLAAYRRD | 165275 | B |
| KEQDVEEWQW | 164951 | B |
| IRRLISIVAW | 164361 | B |
| RSMGHHQDLL | 164056 | B |
| QYHWGHIALH | 163889 | B |
| AHWRPQSHAH | 163876 | B |
| MPEHLVTSKE | 163739 | B |
| QRDHRLSLGE | 163329 | B |
| LDMHLSAIHK | 163214 | B |
| AEQHTLAYTS | 163185 | B |
| SGTESSMEGV | 162754 | B |
| YHSHWGMRKH | 162687 | B |
| MQISWWSLAA | 162289 | B |
| VIMSWHSSHG | 162202 | B |
| EPWMNGRRET | 162027 | B |
| HMSTAKIMEM | 161353 | B |
| RHSELSMTMA | 161341 | B |
| LHTQMTKHHS | 160598 | B |
| AHSFEHEARE | 160431 | B |
| STLVREYHRQ | 160259 | B |
| HHSEQTEHTW | 159713 | B |
| GSMGAGTKQW | 159496 | B |
| WLAWWWVSIM | 159181 | B |
| GYAKAHRELG | 159067 | B |
| LHMESHMAAH | 158934 | B |
| AHAITHTHLT | 158788 | B |
| MISETISAAI | 158755 | B |



|            |        |   |
|------------|--------|---|
| ILYTSWYAES | 158564 | B |
| STFSQKGRWR | 158351 | B |
| GWHLHKKSKS | 157821 | B |
| KVSNQSWHQV | 157744 | B |
| YLGKLDRLG  | 157488 | B |
| ESWENFEIWE | 157478 | B |
| VATVLWITQW | 157302 | B |
| KQNMKTLVAW | 157234 | B |
| HMYFHGHHEP | 157186 | B |
| PTTTQRHKWT | 157116 | B |
| ASARWMKKRV | 157052 | B |
| LHHESHLRAI | 157046 | B |
| VHHGNMHAVH | 157044 | B |
| KKRIAWMGRW | 156781 | B |
| VHYGMQHQSE | 156444 | B |
| RHVRTRWVKP | 156430 | B |
| VMMRHDVMQR | 156282 | B |
| VASVIWHSRW | 156139 | B |
| KARKSSHGLW | 156050 | B |
| EHHGRQHLMI | 155776 | B |
| GKWGYRRTGK | 155489 | B |
| DKSDRKRHSN | 155381 | B |
| SQSRERRHSG | 154979 | B |
| RIEGWRGKD  | 154477 | B |
| EARQQLRGVE | 154147 | B |
| IESTKEQEEM | 153952 | B |
| PDEEESWALW | 153859 | B |
| HFYAMQSRKW | 153781 | B |
| SWWWENIFWW | 153697 | B |
| MLRGNESHRH | 153278 | B |
| PVWMWLLATE | 153050 | B |
| LYLETRTQLH | 152997 | B |
| WHAWWSVKHK | 152922 | B |
| ERHQGGHEDH | 152725 | B |
| EEMQPATTEG | 152321 | B |
| KTYMGKAYHM | 152118 | B |
| QWIMWARSTP | 152036 | B |
| AHTRRHGHWK | 151903 | B |
| LSHHKASWK  | 151717 | B |
| GHEKALTHRM | 151585 | B |
| VKTKSTWERA | 151213 | B |

|            |        |   |
|------------|--------|---|
| WANWAMSLYL | 151205 | B |
| LHMQFHKAAH | 151186 | B |
| QGWPGRAQIM | 150550 | B |
| WWELPLMLQI | 149583 | B |
| GMQRIVSSEI | 149517 | B |
| KIGWLHRMTQ | 149489 | B |
| MWPWGTAQGG | 149309 | B |
| AWNANHARHM | 149052 | B |
| RKYWHQFTGH | 148926 | B |
| QTIPAQMPME | 148916 | B |
| GEVGTLEHKH | 148896 | B |
| GSYHKELSYK | 148753 | B |
| RWTQKAISKG | 148693 | B |
| VMMRHEVSER | 148322 | B |
| HEHDSLHLYK | 148295 | B |
| GLLWMTLIRH | 147942 | B |
| AGQSEERSTW | 147678 | B |
| IEGHSIMTTH | 147597 | B |
| SGQWGKRGHH | 147508 | B |
| ESMTPQVNTT | 147489 | B |
| KLKAEHSWRD | 147130 | B |
| HHRGQHLTRW | 147129 | B |
| EENEPEHMQQ | 147098 | B |
| HHIKGAVWLR | 147083 | B |
| EHWTHRREKT | 146920 | B |
| RWSPHQGHHS | 146780 | B |
| YSRVGEDTHG | 146780 | B |
| MPSGDQMKSH | 146542 | B |
| RRRWEEERHK | 146209 | B |
| KAEEHGPHWE | 146138 | B |
| LFLSHRSTLE | 146119 | B |
| SNHHEKHMLL | 146025 | B |
| NTVNALGEGF | 145933 | B |
| AHVGKPQGMY | 145860 | B |
| THEHATSAHI | 145778 | B |
| RGTHVRHWAK | 145759 | B |
| VAKKMLPPWH | 145653 | B |
| ARKMGNAIKW | 145584 | B |
| HITVHIQVNW | 145560 | B |
| HITLGHRTPP | 145493 | B |
| MIRHIKMGMA | 145418 | B |

|            |        |   |
|------------|--------|---|
| THSWQKVAAV | 145415 | B |
| STGIKWRHAT | 145400 | B |
| HGAWSAASKH | 145358 | B |
| KSTRVGGAQW | 145051 | B |
| AQWVKHHNGG | 144843 | B |
| AEWYWSWWE  | 144409 | B |
| SDTKLKAKWA | 144346 | B |
| MPRQGPMELH | 144040 | B |
| PAQKEAWVGQ | 143998 | B |
| AHLDSKQHQR | 143874 | B |
| HHLMHAVYMN | 143531 | B |
| MRAFMMGRGH | 142996 | B |
| RILQSMEHER | 142708 | B |
| GSKAAGSSWA | 142652 | B |
| WEAYAKITLT | 142627 | B |
| GSAHLRERE  | 142127 | B |
| KVQELPWGGI | 142052 | B |
| RWKWHSRRLK | 142043 | B |
| LEGHTLPTTH | 141991 | B |
| SLNHLPSHSR | 141931 | B |
| SWRLSKRQMG | 141845 | B |
| IWGWMTRKVR | 141813 | B |
| EHTHWNHMRS | 141369 | B |
| TDHIHHHEQD | 140974 | B |
| IHIRFGHKEQ | 140843 | B |
| KGGEQASMER | 140392 | B |
| TSHRITHGMG | 140282 | B |
| RHWGSTTTQI | 139444 | B |
| GLTHHQGHTH | 139345 | B |
| SSIYRQYHRR | 138875 | B |
| HHGQMGHAAH | 138515 | B |
| MSEWALELWL | 138375 | B |
| MQHSEVLVHK | 138291 | B |
| PQIIWTHREM | 138073 | B |
| LQSWFGKPSH | 138038 | B |
| KMGTPRHGSL | 137978 | B |
| PWPDVLHLSV | 137391 | B |
| KMDTHAMHGG | 136747 | B |
| WLRSRKKRIG | 136665 | B |
| DMGMGRMSKL | 136282 | B |
| GWWSGTSKAH | 134937 | B |

|            |        |   |
|------------|--------|---|
| RETAELEMWR | 134732 | B |
| RLTSEHEADG | 134705 | B |
| GTSMAIWTHM | 134607 | B |
| KHLISLAHAQ | 134478 | B |
| VRLAILGHKH | 134115 | B |
| LRWLFSRLEE | 133820 | B |
| HGSEYSRHKG | 133515 | B |
| KRWMSTRKEG | 133397 | B |
| EHWKTMKTPK | 133281 | B |
| AAAWQQQAH  | 133166 | B |
| GWWMSKSRQM | 132865 | B |
| WIYEWELTST | 132607 | B |
| ASRKAQTWR  | 132590 | B |
| MMRGWSYSGG | 132529 | B |
| SMKAASEHET | 132405 | B |
| RQPALMEHPY | 132035 | B |
| RRKMGQAIKW | 131407 | B |
| YSIHRGSMST | 131369 | B |
| GKKQTARMWK | 130148 | B |
| YIEGKLRRLG | 130089 | B |
| KHEERTASS  | 129945 | B |
| WQGHWHIRAS | 129894 | B |
| QKLGKTGYM  | 129722 | B |
| QEMHWEQKAA | 129411 | B |
| TGGSQTSGHH | 129235 | B |
| KMESMIRQGL | 129102 | B |
| VWSWWYWGIW | 129102 | B |
| HTKSQEMMEH | 128828 | B |
| MADRRWIKAH | 128353 | B |
| KMSGRNKLFH | 128046 | B |
| GPLRILGLAK | 127971 | B |
| EHHGREHKML | 127953 | B |
| RWSAKWSRSH | 127903 | B |
| GKQGHWPRTW | 127856 | B |
| QEHRMAERHN | 127669 | B |
| KRHTRDGGLE | 126756 | B |
| GHAGKPYPAL | 126451 | B |
| RRKMMQNHSS | 126426 | B |
| RASHWARSHM | 126392 | B |
| QTNHTGLNQE | 126214 | B |
| KSHHHRRLQL | 126184 | B |

|             |        |   |
|-------------|--------|---|
| KVHHIGTNWE  | 125839 | B |
| EEHQPAGRHO  | 125177 | B |
| VNEHRRRVEG  | 125122 | B |
| EENAITWIWA  | 124939 | B |
| NHRTQRHPHM  | 124901 | B |
| QMTQRKQHSQ  | 124879 | B |
| KHRHIKKGMA  | 124820 | B |
| KVREIMWGGH  | 124723 | B |
| ASDShLGHIR  | 124653 | B |
| QKWSEHHLSK  | 124544 | B |
| HKGALHKVHH  | 124485 | B |
| EEQESEISEQ  | 124150 | B |
| APRSHIGHHA  | 124120 | B |
| TNWHQWHTYR  | 123265 | B |
| AKRWRDWSGF  | 122975 | B |
| HKYMHGHHQM  | 122672 | B |
| QTHVLWFQAH  | 122640 | B |
| SLFIQWEETE  | 122330 | B |
| TLLWMVWLWS  | 122212 | B |
| SHQRGATAMH  | 121924 | B |
| RTITKRWLWP  | 121548 | B |
| MSPVVKSHQK  | 121387 | B |
| EAWIWANWIS  | 121311 | B |
| IEAMLKGWWY  | 121260 | B |
| HQMSLEQEQK  | 121183 | B |
| MGAEMHPPTS  | 120788 | B |
| SSHLRESASH  | 120764 | B |
| TISHTHRHRQR | 120437 | B |
| QWWAFWWEWI  | 119313 | B |
| WWIGFAMKKM  | 119305 | B |
| MKMGHGPRPR  | 118932 | B |
| SLHRRRAFST  | 118914 | B |
| AQSQWMKKKW  | 118884 | B |
| RQSAQIQKWR  | 118104 | B |
| ALGGNEATDT  | 118052 | B |
| RLWKRGGHKL  | 117851 | B |
| ARWAHFIRKW  | 117423 | B |
| LEIHPEPRRR  | 117245 | B |
| KRQQQMTAIW  | 117116 | B |
| AENGLAYSS   | 116789 | B |
| AHHHGGSEQT  | 116403 | B |

|            |        |   |
|------------|--------|---|
| KRWKTGLDPK | 116209 | B |
| RMTERKHHRQ | 115530 | B |
| GKRRYSSQH  | 115347 | B |
| HGRHKRMPQI | 115330 | B |
| AYIHSLRLFI | 115172 | B |
| SKHGHEDHES | 115024 | B |
| WEAYALISLS | 114833 | B |
| TRRPYRWSMM | 114591 | B |
| SKWKAHQETK | 114482 | B |
| ESVTTHTSAF | 114449 | B |
| GHAGLMYMAL | 114019 | B |
| MIKLTKAIAE | 114011 | B |
| MWTVKLLSSR | 113397 | B |
| MGTILLTNSH | 113364 | B |
| HNWLQSHRGQ | 112780 | B |
| RHSEQGTDHM | 112774 | B |
| KHWMKVSPMK | 112233 | B |
| KKSGGVFHLR | 112150 | B |
| IHWKLVPKKL | 111836 | B |
| SHWRLIRRKS | 111818 | B |
| EIQSVENEAF | 111800 | B |
| RSTAHWSASQ | 110623 | B |
| KQRAGHDKMW | 110582 | B |
| RHSEVWTKHV | 110486 | B |
| VAWVKWLWQW | 110249 | B |
| KSIRWLSAGH | 109658 | B |
| LKDLSYKRDK | 109572 | B |
| KGAHHRASEA | 109232 | B |
| TKSRLPTHHR | 109140 | B |
| LGRVAMADLL | 108885 | B |
| HHKTTGWMHK | 108868 | B |
| SSRQYAWPDT | 108825 | B |
| HAHSKQWTVS | 108541 | B |
| KEAHHEWHGA | 108476 | B |
| EHGEHHYVEK | 108469 | B |
| MHKEIQGAGR | 108035 | B |
| GTHIHKKSLS | 107361 | B |
| IHFHHKASTL | 107314 | B |
| MTMRVLHISV | 107241 | B |
| HMWAHHGKTR | 107209 | B |
| RNPSHEAKMY | 107173 | B |

|            |        |   |
|------------|--------|---|
| KRHSQVIVHL | 107171 | B |
| YKPMVRSGYH | 107128 | B |
| GLTEWLSDRG | 106573 | B |
| QAHDGGHQRH | 106236 | B |
| GSIWQEAKTQ | 106138 | B |
| QGNDSLESTG | 105745 | B |
| AGIMLTKGME | 105491 | B |
| GHTQAIHHHK | 104718 | B |
| HHRGYQWSPG | 104372 | B |
| QQKDMASSQG | 104244 | B |
| KAQKTSHGKW | 103299 | B |
| HEKSMHWLRS | 103105 | B |
| LGKQEHATRL | 103005 | B |
| MIRLSAAEIR | 102749 | B |
| HTSKHSWHIQ | 102541 | B |
| KGKQGSAGGW | 102516 | B |
| IWRRKSTSAM | 102499 | B |
| ESSLPGGAEE | 102492 | B |
| QHTKSKLSML | 102118 | B |
| RLQTERAGWK | 102104 | B |
| RSAATKHLHT | 102049 | B |
| RGFERGTRHK | 101739 | B |
| STLHMNVVAH | 101404 | B |
| GEVGTKEHMH | 101354 | B |
| QNEQKLDVGF | 101106 | B |
| LHGLLHRMSR | 100939 | B |
| IAKSHTRGHQ | 100584 | B |
| KMTGGVSHKR | 100417 | B |
| HSKRKKHMAM | 99885  | B |
| TSTQPMTQTH | 99492  | B |
| TTHETVRLGT | 99274  | B |
| KGLHSGSRNN | 99112  | B |
| SSIHKRYVAH | 99018  | B |
| TIMELEPYLW | 98639  | B |
| HEHQLHKYM  | 98559  | B |
| MQQWHGEKGR | 98290  | B |
| YHKHTELRIH | 98231  | B |
| KSMSREKYTA | 98041  | B |
| LWYLSSRRKA | 97680  | B |
| ERNHQKSQKH | 97448  | B |
| AYIHTKRKSL | 96745  | B |

|             |       |   |
|-------------|-------|---|
| ATRKKRETWQ  | 96534 | B |
| VHHNHGRWHK  | 95234 | B |
| GHAHMSYTAK  | 95003 | B |
| ESGHHHSESK  | 94961 | B |
| ETHHGAMKRS  | 94723 | B |
| HQHIERAMAN  | 94711 | B |
| LTSHVHGGTK  | 93935 | B |
| KQQRRAWKHHG | 93832 | B |
| RSQWWSWALG  | 93484 | B |
| RRQNKIRVGM  | 93333 | B |
| TMHVHRHEAN  | 93175 | B |
| TGGSETSGHH  | 92867 | B |
| SMHHSFQQAK  | 92611 | B |
| AEAKSSIKHH  | 91967 | B |
| KTEHSMQGGM  | 91909 | B |
| WSRHHHHAKH  | 91800 | B |
| IATSLAEIHK  | 90868 | B |
| TKWKIYIKKW  | 90790 | B |
| TPHEHQKELE  | 90061 | B |
| HVHSHEENGT  | 89965 | B |
| EATSQMWSER  | 89896 | B |
| VSSDIEVTEN  | 89893 | B |
| RSMSLHRVLI  | 89844 | B |
| SWHGKQTKSG  | 89658 | B |
| VHEYMERKNS  | 89330 | B |
| RWRMYTKSRA  | 89016 | B |
| SETISQGMRA  | 88774 | B |
| TQMRFHIIKH  | 88766 | B |
| RKQLWRVIL   | 88758 | B |
| GWWAATLSLR  | 88716 | B |
| TKKGESSWK   | 88352 | B |
| LQAGHDSGGA  | 88269 | B |
| TKIQRQASSW  | 87763 | B |
| ASSGHHKETR  | 87216 | B |
| KSMVVKSHRK  | 86487 | B |
| PKKAAPQHQT  | 86438 | B |
| SSEEMHHKGV  | 86227 | B |
| VKFGYGHGMV  | 86225 | B |
| LGSHHHSRKH  | 85875 | B |
| NKLMKRVRMF  | 85549 | B |
| SRHHHHHERR  | 85535 | B |



|             |       |   |
|-------------|-------|---|
| IWFMTAMKKL  | 85378 | B |
| LVKHRWWGSQ  | 84742 | B |
| EQYSKCLKLT  | 84454 | B |
| KSKGMARPHG  | 84408 | B |
| YSAKRKLQHR  | 83970 | B |
| TIHRLSSGMM  | 83813 | B |
| HTKAEIHEKK  | 83731 | B |
| EHGQHHYVQK  | 82804 | B |
| GWIEQKGMRK  | 81675 | B |
| LAQQHGKGSE  | 81338 | B |
| SLMIDWEQSQ  | 80445 | B |
| VQATHDAASG  | 80287 | B |
| HDKPIQRQRL  | 80088 | B |
| RGAMGKKKEA  | 79544 | B |
| KGSHIISRMH  | 79060 | B |
| LEAQLGKKFK  | 78865 | B |
| RSKAEWSKTA  | 78791 | B |
| QMKS KDVRPS | 78724 | B |
| VAIAHLEGKH  | 78493 | B |
| KRFAHTRSSK  | 78258 | B |
| SMEEPEKTKI  | 78025 | B |
| TQIIGPHSKM  | 77985 | B |
| AHVGPTTEGTV | 77700 | B |
| TSDWSGHGAQ  | 77682 | B |
| YGHTFTRQKA  | 77650 | B |
| HTPAAHTTWA  | 77560 | B |
| IEIHMEMARR  | 77462 | B |
| EISSRKWKEG  | 76915 | B |
| MRLARSERSH  | 76900 | B |
| IEKETHEEGK  | 76389 | B |
| IHWLIVMKLI  | 76224 | B |
| LRHSRRGGIQ  | 75749 | B |
| AKHRSATITQ  | 75572 | B |
| RESALPGHSY  | 75416 | B |
| KHQQRISAPP  | 75324 | B |
| LEVRKETGAQ  | 75048 | B |
| STAHTMLGSL  | 74911 | B |
| KHRVASAQKM  | 74820 | B |
| LSYSIHIIET  | 74519 | B |
| GRSLSKHGSH  | 74339 | B |
| WRQRKLQNRS  | 73683 | B |

|            |       |   |
|------------|-------|---|
| SHKEHQKYIS | 73648 | B |
| RGKEHVNDG  | 73634 | B |
| ESHGAKKRF  | 73398 | B |
| EGPHTRGKAM | 73016 | B |
| GTTKTHHAEG | 72848 | B |
| RRMHSHTAV  | 72196 | B |
| SIITKVVWTF | 72055 | B |
| MTQSTGHNYK | 72023 | B |
| TSAQHLRQAL | 71327 | B |
| WSYEASFRGA | 71126 | B |
| YLSKPSWERA | 70607 | B |
| ASSGHHKQTR | 70564 | B |
| MLRHRTRIKK | 70092 | B |
| GAKYHTSARH | 69887 | B |
| EQHLEGKETM | 69187 | B |
| AEAMTSLKHH | 69186 | B |
| GKMSALHKQK | 67553 | B |
| AGHTRIGNVA | 67373 | B |
| NRPHSHMTRV | 67283 | B |
| RQHIWARTRS | 66799 | B |
| KSSSWHRPLK | 66593 | B |
| TMSETNKTAR | 66569 | B |
| QEGLRDQAH  | 66469 | B |
| DGPEHVQQH  | 66453 | B |
| TNLETGSGGL | 66143 | B |
| QSARTKHKHT | 65840 | B |
| SGIKTQYEIG | 65547 | B |
| KIHPGEQYVT | 65249 | B |
| EQESQYRQAG | 65129 | B |
| IHGEPGIRAH | 64980 | B |
| RMSAGTPAMQ | 64974 | B |
| HTLTGEERQK | 64805 | B |
| GWQGSYMGKS | 64421 | B |
| DTSTLHQVKI | 64238 | B |
| RISELSFTSR | 64144 | B |
| YKGHFKQRMH | 64064 | B |
| GSEIRMHMRS | 63845 | B |
| SFSLGTQTR  | 63769 | B |
| WIKTKQKRGK | 63743 | B |
| EQTATWGIAS | 63208 | B |
| RAWHAAYARR | 62751 | B |

|            |       |   |
|------------|-------|---|
| SHKDASVHSQ | 62067 | B |
| RKEWRYAFKS | 61006 | B |
| MARKQATYGR | 60982 | B |
| AGLSETAAET | 60844 | B |
| EHGESVSKKL | 60657 | B |
| RQGIRRRRAH | 60570 | B |
| AHHHGGSQRT | 60507 | B |
| REGMGPLGET | 60106 | B |
| EREQLGSTSK | 59849 | B |
| VMGTGSGKHA | 59161 | B |
| HSGRMHSVHH | 59005 | B |
| QSTEQMIIRE | 58502 | B |
| TETLSEGPQA | 58417 | B |
| VGYEKRHRSE | 57761 | B |
| KSPEAMLGRG | 57305 | B |
| SQASPMHQGH | 57189 | B |
| HGLYKKTSSR | 56337 | B |
| GAGWQSQATL | 55931 | B |
| SKGVGRHEAR | 55843 | B |
| EWHGTTGRKS | 55249 | B |
| KQFHKSALIM | 54749 | B |
| TISGKEHRHQ | 53998 | B |
| QKRTHASKEA | 53436 | B |
| KYTDMWKPTK | 53329 | B |
| GHWNQIGRGV | 52462 | B |
| PLQKSAEELD | 52388 | B |
| GMIRILGLAL | 52312 | B |
| YSIHRGSKSS | 52161 | B |
| HHTKKHKTRG | 51932 | B |
| VQEINRNVEH | 51535 | B |
| ERHLQGLQSK | 50169 | B |
| SSHKQESASH | 50042 | B |
| PTWERIVSTQ | 49611 | B |
| GEKAIITGLQ | 49209 | B |
| HVHSHQQRGT | 49073 | B |
| KPKPRQKYSA | 48783 | B |
| LSMQAKIGAG | 48208 | B |
| QGMHTRGLAK | 48191 | B |
| AKMTVRMKQK | 46944 | B |
| KLKQTHIPGE | 46939 | B |
| EHGETVSKKK | 46849 | B |

|             |       |   |
|-------------|-------|---|
| RHHSLSSTPKH | 46744 | B |
| RQTAHHEARH  | 45148 | B |
| RDHHMQLSGR  | 45054 | B |
| GTELRPHPDS  | 44889 | B |
| RGLEMEDKAK  | 44839 | B |
| MKKTTTGLPS  | 44403 | B |
| RSHKARLKLQ  | 44347 | B |
| VHTRSYIIVK  | 44267 | B |
| KHGIKMHLK   | 43057 | B |
| QTSILAHAK   | 42971 | B |
| TMSHSTGRAI  | 42595 | B |
| PRKADTEQSH  | 42489 | B |
| EQECPKQVGS  | 41584 | B |
| TSEAGAGAGT  | 41570 | B |
| EQAERTYMKL  | 41053 | B |
| GWSTRALKKA  | 40868 | B |
| HRGHQRAKAR  | 40574 | B |
| AKKHHKKRIR  | 40464 | B |
| EEHKENQEAH  | 40460 | B |
| SKQQMQLSKH  | 40453 | B |
| ERQHEKTEKI  | 40436 | B |
| GQLAHHSGLR  | 39818 | B |
| TKSEKFHTKL  | 38451 | B |
| SSTGQESMTH  | 38250 | B |
| KQRMQRGTLA  | 37948 | B |
| VRQHRARVQG  | 37589 | B |
| KKSEMEKDTR  | 37253 | B |
| QWSPRARTGR  | 36961 | B |
| LATSKAGLHK  | 36622 | B |
| SSSHGKKTAE  | 36586 | B |
| PKTGPSDGHS  | 36473 | B |
| HSISGQRRK   | 35946 | B |
| VRKALMGHPI  | 35705 | B |
| VHQYKERKRS  | 35705 | B |
| ATQTHKHHLR  | 35669 | B |
| PPRGGHKERR  | 34723 | B |
| KKGSMRHGSL  | 34377 | B |
| ENQIRLSKGE  | 34275 | B |
| TQATSSHEHI  | 33540 | B |
| GGGRWRAGPA  | 32970 | B |
| SGGQKKQESE  | 31824 | B |

|             |       |   |
|-------------|-------|---|
| RSSHSSQKE   | 31763 | B |
| AHVGKSEGSV  | 31319 | B |
| GAEEKQHVG   | 31033 | B |
| KKSHDTSRR   | 30555 | B |
| QHATHPSMGR  | 29593 | B |
| RSLTDKLSSD  | 29406 | B |
| WKQQSTSSKA  | 29027 | B |
| RRTKHRHQSS  | 28853 | B |
| VSAKRKKEHN  | 28607 | B |
| NQHIPEKTGQ  | 28475 | B |
| MVDRKTGARA  | 28165 | B |
| RDEQSKHST   | 26618 | B |
| ERKRMIITAK  | 26347 | B |
| SWWPTVRKSK  | 25775 | B |
| HVRKTEASKT  | 25538 | B |
| RGRRSIQFTG  | 25486 | B |
| RSRGMEHRRE  | 25444 | B |
| GDQEKQRQKQ  | 25233 | B |
| GNSKSMIHS   | 24751 | B |
| IHDRSRSTEK  | 24447 | B |
| RGLSKASLID  | 24414 | B |
| HHKSSGWKHK  | 24377 | B |
| TISWRIDVAQ  | 24184 | B |
| SKKTETVHQH  | 23477 | B |
| KSHTTEKKRAQ | 23192 | B |
| ETSTGTSARG  | 22957 | B |
| QPTGKSKVLS  | 22813 | B |
| QTTGIHEEKM  | 21958 | B |
| SRLESGSGGL  | 21783 | B |
| QRSGQLARAE  | 21779 | B |
| LLRISYLRRK  | 21440 | B |
| GKWARMIRRP  | 20449 | B |
| LPHSQKLAAR  | 20434 | B |
| RGEKETAHAT  | 19366 | B |
| HYAPAINGKG  | 19332 | B |
| RGVRSRTVKM  | 18967 | B |
| DSHKANLKKE  | 18952 | B |
| RASMATESTR  | 18807 | B |
| DSRGPEIRDE  | 18661 | B |
| EAQEELRGVG  | 17861 | B |
| NVKASTQVGR  | 17746 | B |

|             |       |   |
|-------------|-------|---|
| FKPGIGNSNR  | 17696 | B |
| YQAVKPF SRM | 17585 | B |
| HGSRRPTQKG  | 17495 | B |
| KHGLKPHKTK  | 17322 | B |
| RTSDKAHSLG  | 16919 | B |
| VKSGVGHGPV  | 16670 | B |
| PTTPQTEAGE  | 16213 | B |
| RKGKEAKSLL  | 16054 | B |
| ERSGELANAG  | 15939 | B |
| MSSTNRHKT   | 15553 | B |
| TKGSIASLRL  | 15444 | B |
| QSGHHHSQSK  | 14498 | B |
| KLSENSEMHK  | 14464 | B |
| SLGSIAFIAI  | 13512 | B |
| GEEENEKE    | 12772 | B |
| TQWASKMKQG  | 12697 | B |
| RSGASRITML  | 12563 | B |
| QSGGRWQQTL  | 11392 | B |
| RRYHKGTNTK  | 10993 | B |
| IANDGGKGSQ  | 9941  | B |
| QDRQMCHKRR  | 9774  | B |
| KTMLWFLRG   | 9660  | B |
| KSMGHWYARK  | 8756  | B |
| TIGKSGKEH   | 6928  | B |
| ALRRRWQLKR  | 6033  | B |
| KVTKTIASE   | 5067  | B |
| SHATGNTQLK  | 3897  | B |
| QAKRMIITAL  | 3101  | B |
| STWTIKTKGT  | 3101  | B |
| KLFQQLRSR   | 3029  | B |
| AMARTKKLRY  | 2271  | B |
| RSMGSMFSRG  | 2179  | B |
| KVSLIIASQ   | 2009  | B |
| SGRESTSTKS  | 1997  | B |
| TKEKEMSGKR  | 1894  | B |
| QGAPGKMKER  | 1561  | B |
| VGGGRKGAVG  | 1409  | B |
| AKKTVRKLK   | 1258  | B |
| GSTTQGNLQG  | 436   | B |
| TAAGNANKNS  | 203   | B |

**Table S2. External Validation Dataset**

| Sequence                   | Class |
|----------------------------|-------|
| WAGAKRLVLRRE               | A     |
| MHGKTQATSGTIQS             | A     |
| LKAHLPPSRLPS               | A     |
| WALRRSIRRQSY               | A     |
| TGTSVLIATPYV               | A     |
| EQLGVRKELRGV               | A     |
| RMRMKMK                    | A     |
| PPPWLPLYMPPWS              | A     |
| AYSSGAPPMPF                | A     |
| TGIFKSARAMRN               | A     |
| KHKHWHW                    | A     |
| TSNAVHPTLRHL               | A     |
| RLNPPSQMDPPF               | A     |
| QTWPPPLWFSTS               | A     |
| GCGLFHAI AHFIHGGWHGLIHGWYG | A     |
| KHKHWHWG                   | A     |
| HHHHHHH                    | B     |
| MHMHMHM                    | B     |
| RHRHRHR                    | B     |
| YHYHYHY                    | B     |
| WHWHWHW                    | B     |
| KHKHKHK                    | B     |
| AHAHAHA                    | B     |
| GHGHGHG                    | B     |
| QHQQHQ                     | B     |
| IHIHIHI                    | B     |
| NHNHNHN                    | B     |
| VHVHVHV                    | B     |
| SHSHSHS                    | B     |
| THTHTHT                    | B     |
| EHEHEHE                    | B     |
| DHDHDHD                    | B     |
| LHLHLHL                    | B     |
| FHFHFHF                    | B     |
| PHPHPHP                    | B     |

|              |   |
|--------------|---|
| MEGQYKSLLFT  | B |
| VAPRVQNLHFGA | B |
